# Supplementary material
Source: Royal Society of Chemistry journal article supplement (doi:10.1039/d6cp00934d)
Supplement: d6cp00934d1.pdf [file d6cp00934d1.pdf]

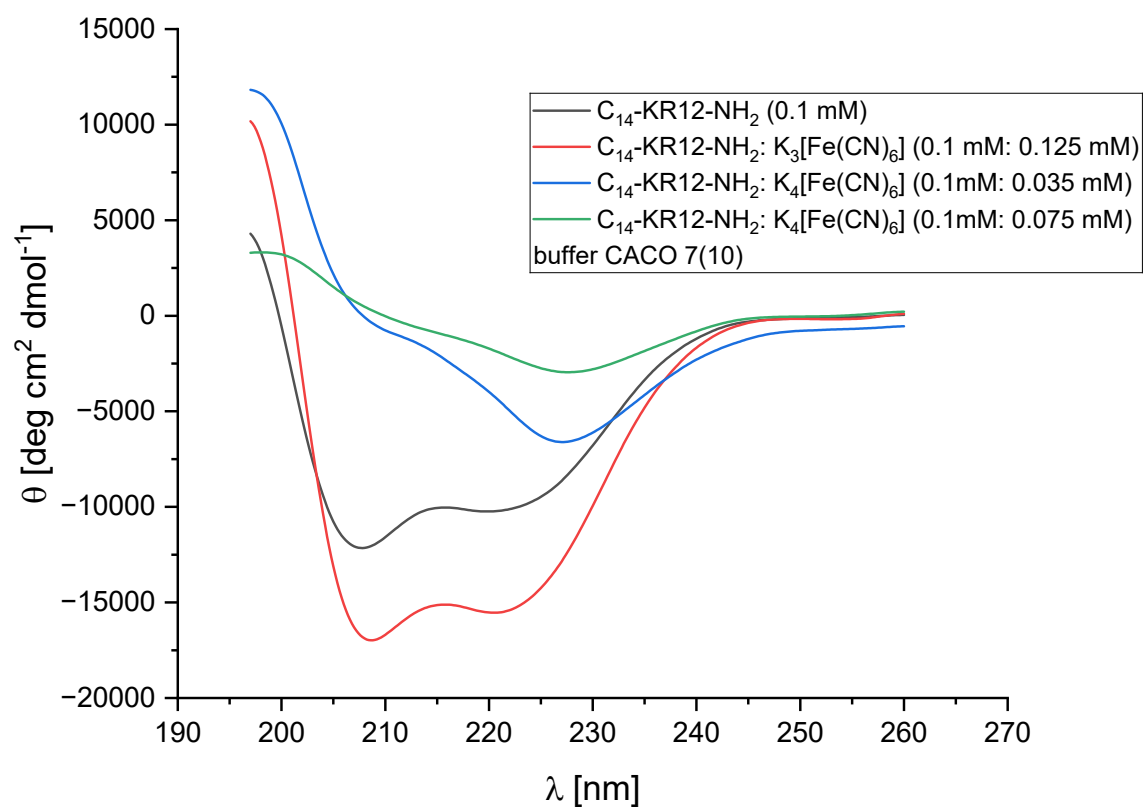

**Figure S1.** CD spectra of the C<sub>14</sub>-KR12 peptide in the presence of potassium ferricyanide (K<sub>3</sub>[Fe(CN)<sub>6</sub>]) and potassium ferrocyanide (K<sub>4</sub>[Fe(CN)<sub>6</sub>]) recorded in 10 mM sodium cacodylate buffer at pH 7 and 298.15 K.

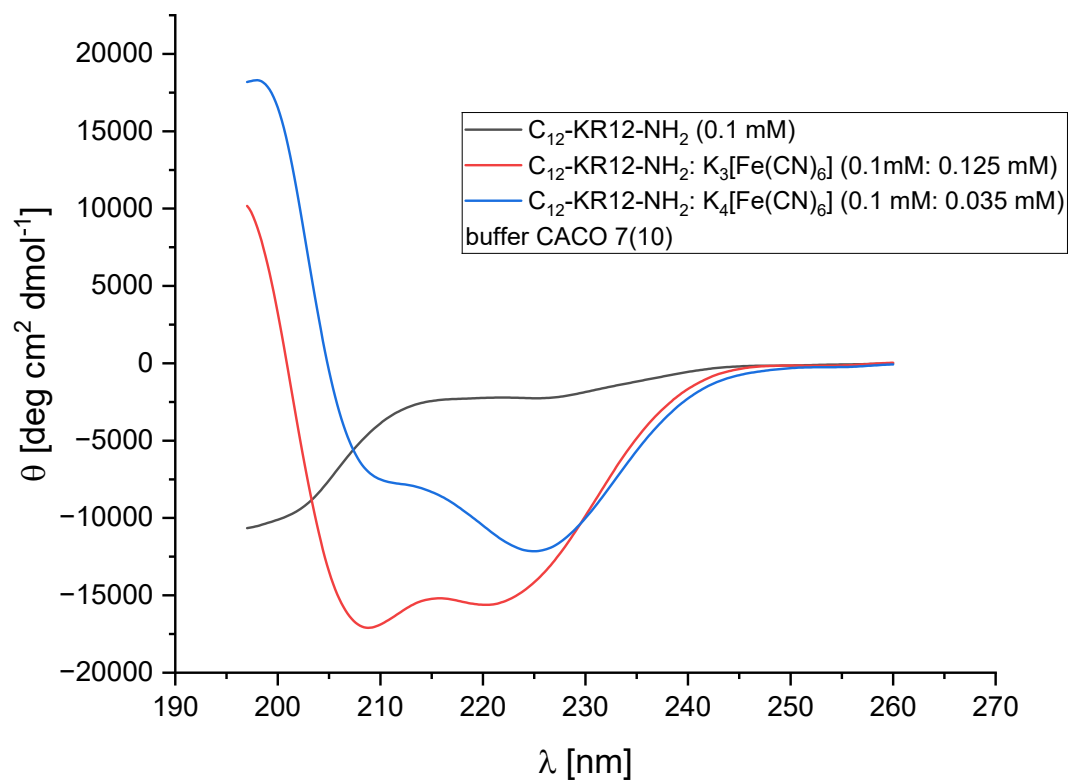

**Figure S2.** CD spectra of the C<sub>12</sub>-KR12 peptide in the presence of potassium ferricyanide (K<sub>3</sub>[Fe(CN)<sub>6</sub>]) and potassium ferrocyanide (K<sub>4</sub>[Fe(CN)<sub>6</sub>]) recorded in 10 mM sodium cacodylate buffer at pH 7 and 298.15 K.

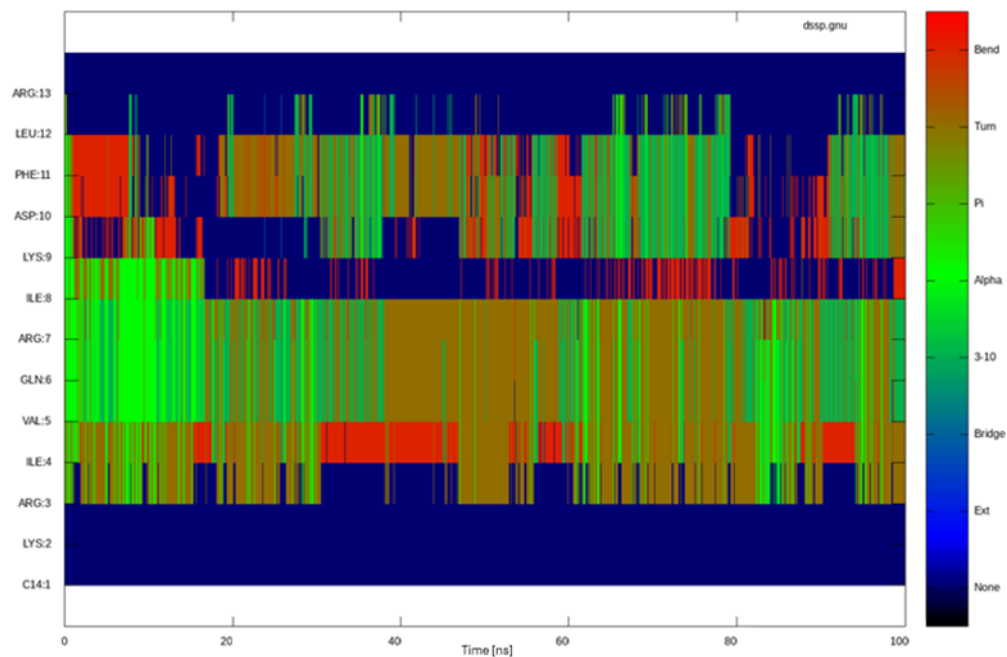

**Figure S3.** Time evolution of secondary structure elements of the C14-KR12 peptide in the presence of  $[\text{Fe}(\text{CN})_6]^{3-}$  obtained from the DSSP analysis for the MD simulation.

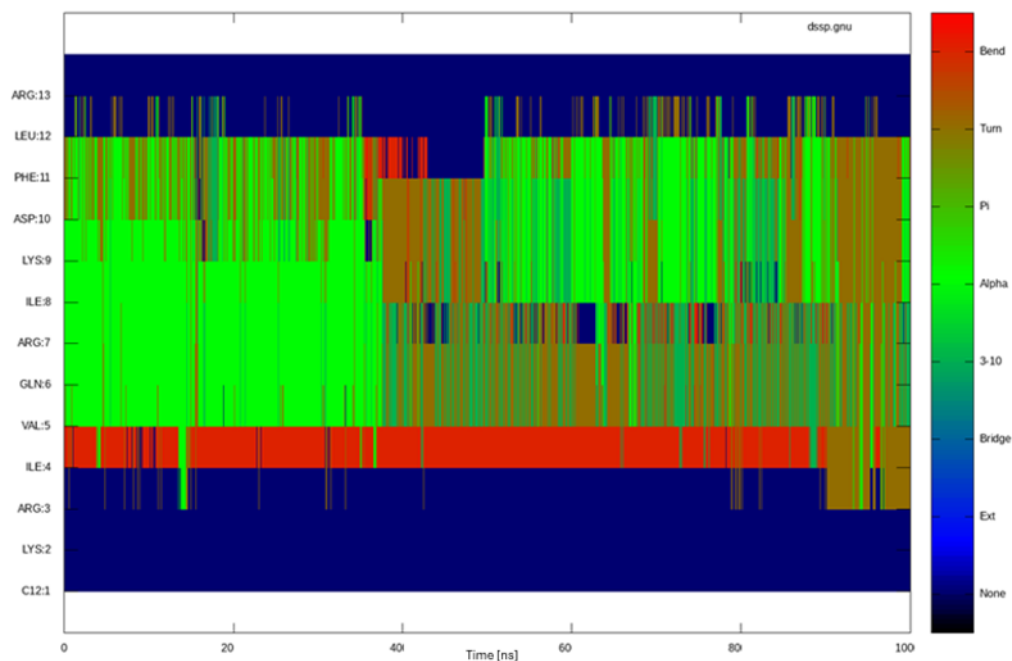

**Figure S4.** Time evolution of secondary structure elements of the C14-KR12 peptide in the presence of  $[\text{Fe}(\text{CN})_6]^{4-}$  obtained from the DSSP analysis for the MD simulation.

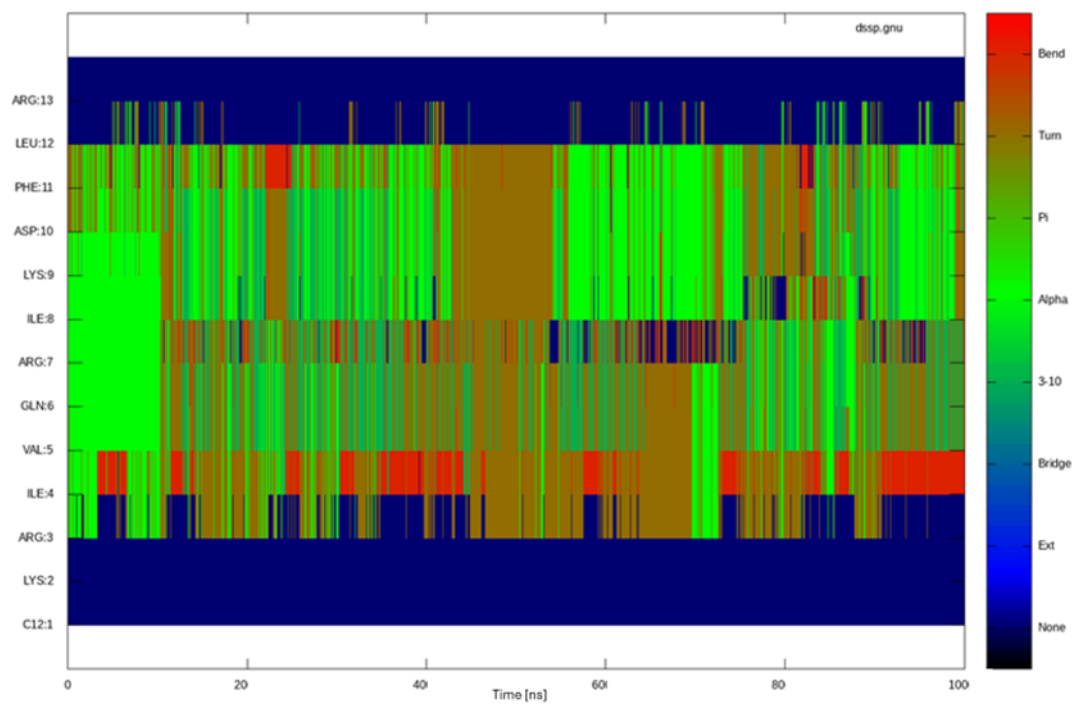

**Figure S5.** Time evolution of secondary structure elements of the C12-KR12 peptide in the presence of  $[\text{Fe}(\text{CN})_6]^{3-}$  obtained from the DSSP analysis for the MD simulation.

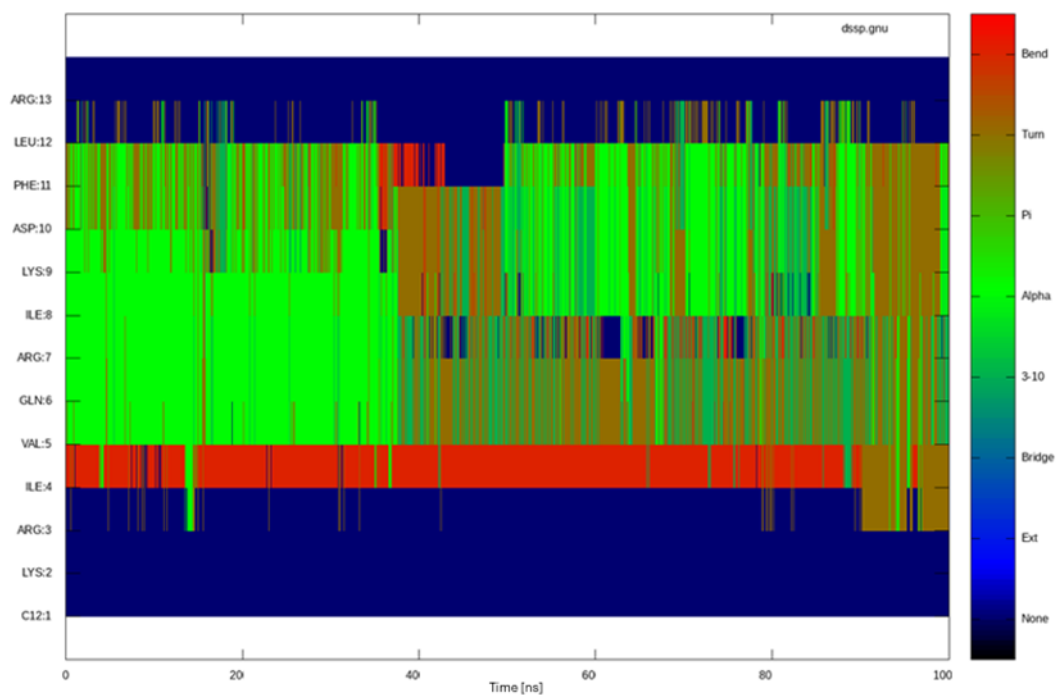

**Figure S6.** Time evolution of secondary structure elements of the C12-KR12 peptide in the presence of  $[\text{Fe}(\text{CN})_6]^{4-}$  obtained from the DSSP analysis for the MD simulation.

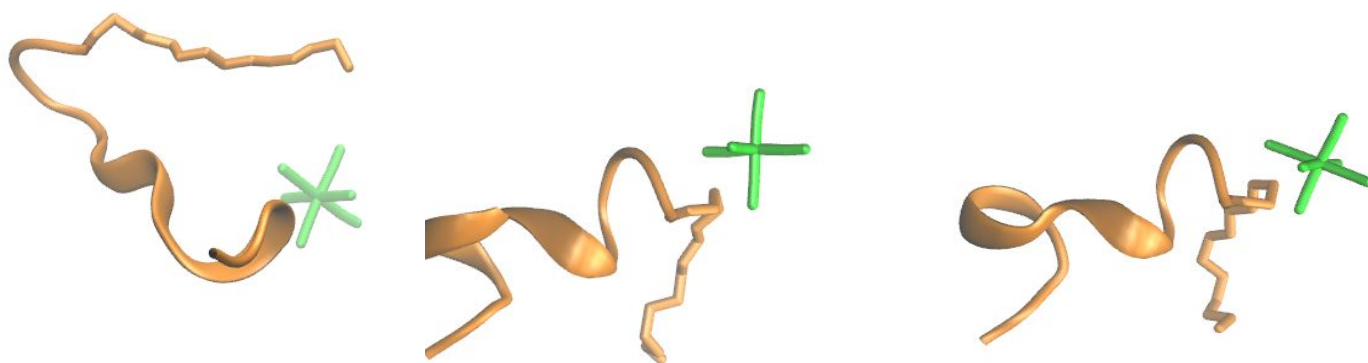

**Figure S7.** Representative MD snapshot of C14-KR12 in the presence of  $[\text{Fe}(\text{CN})_6]^{3-}$ , showing a predominantly disordered structure with only transient helical elements.

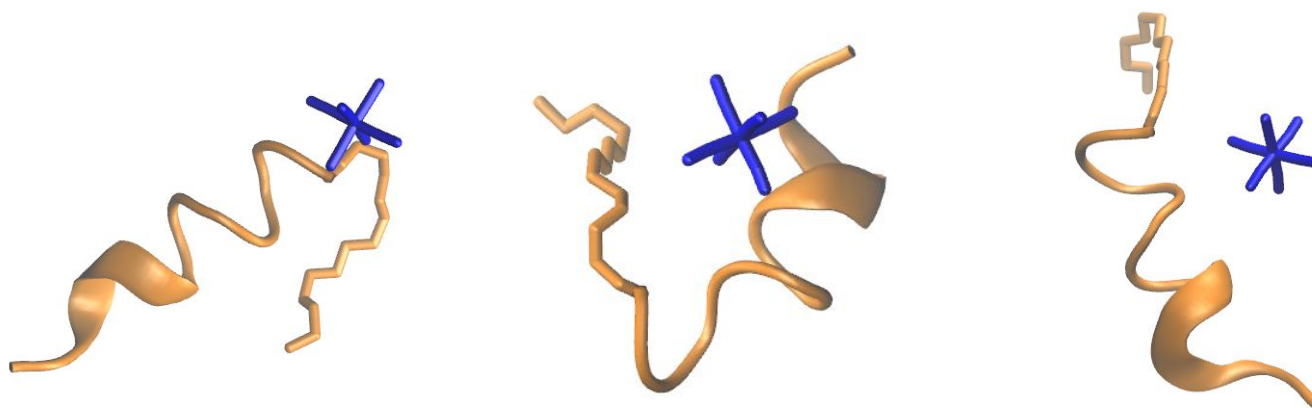

**Figure S8.** Representative MD snapshot of C14-KR12 in the presence of  $[\text{Fe}(\text{CN})_6]^{4-}$ , illustrating partial stabilization and increased helical content.

**Table S1.** Average per-residue distances between the C14-KR12/ C12-KR12 peptides residues and the center of mass of  $\text{K}_4[\text{Fe}(\text{CN})_6]/ \text{K}_3[\text{Fe}(\text{CN})_6]$ .

| C14-KR12 + $[\text{Fe}(\text{CN})_6]^{4-}$ |                                           |
|--------------------------------------------|-------------------------------------------|
| <i>Residue</i>                             | <i>Distance [<math>\text{\AA}</math>]</i> |
| Lys1                                       | $7.1 \pm 1.2$                             |
| Arg2                                       | $7.8 \pm 1.4$                             |
| Ile3                                       | $13.3 \pm 1.1$                            |
| Val4                                       | $13.3 \pm 1.6$                            |
| Gln5                                       | $11.2 \pm 2.4$                            |
| Arg6                                       | $14.2 \pm 2.7$                            |
| Ile7                                       | $17.4 \pm 1.6$                            |

|                                                     |                     |
|-----------------------------------------------------|---------------------|
| Lys8                                                | 19.0± 2.2           |
| Asp9                                                | 21.9± 1.5           |
| Phe10                                               | 18.2± 2.3           |
| Leu11                                               | 19.5± 2.7           |
| Arg12                                               | 21.0± 4.2           |
| <b>C14-KR12 + [Fe(CN)<sub>6</sub>]<sup>3-</sup></b> |                     |
| <i>Residue</i>                                      | <i>Distance [Å]</i> |
| Lys1                                                | 22.5±10.2           |
| Arg2                                                | 23.2±9.7            |
| Ile3                                                | 22.7±9.2            |
| Val4                                                | 22.8±9.6            |
| Gln5                                                | 23.9±9.5            |
| Arg6                                                | 23.9±9.5            |
| Ile7                                                | 23.3±9.5            |
| Lys8                                                | 23.9±9.2            |
| Asp9                                                | 24.9±8.6            |
| Phe10                                               | 25.2±8.5            |
| Leu11                                               | 25.9±8.1            |
| Arg12                                               | 27.6±6.9            |
| <b>C12-KR12 + [Fe(CN)<sub>6</sub>]<sup>4-</sup></b> |                     |
| <i>Residue</i>                                      | <i>Distance [Å]</i> |
| Lys1                                                | 8.7± 5.2            |
| Arg2                                                | 9.7± 5.8            |
| Ile3                                                | 14.5± 4.9           |
| Val4                                                | 14.8± 4.7           |
| Gln5                                                | 14.3± 5.7           |
| Arg6                                                | 16.2± 5.4           |
| Ile7                                                | 19.0± 4.3           |
| Lys8                                                | 22.3± 4.2           |
| Asp9                                                | 21.2± 4.8           |
| Phe10                                               | 20.0± 4.5           |
| Leu11                                               | 22.0± 4.3           |
| Arg12                                               | 25.9± 3.4           |
| <b>C12-KR12 + [Fe(CN)<sub>6</sub>]<sup>3-</sup></b> |                     |
| <i>Residue</i>                                      | <i>Distance [Å]</i> |

|       |           |
|-------|-----------|
| Lys1  | 9.6± 6.3  |
| Arg2  | 10.3± 6.1 |
| Ile3  | 13.0± 5.4 |
| Val4  | 13.4± 4.8 |
| Gln5  | 13.6± 4.5 |
| Arg6  | 15.6± 4.5 |
| Ile7  | 16.7± 4.2 |
| Lys8  | 18.7± 4.5 |
| Asp9  | 19.4± 3.3 |
| Phe10 | 18.3± 4.3 |
| Leu11 | 19.2± 4.4 |
| Arg12 | 22.1± 4.2 |

**Table S2.** Radius of gyration (Rg) of single peptide systems (C12-KR12 and C14-KR12) in the presence of  $[\text{Fe}(\text{CN})_6]^{3-}$  and  $[\text{Fe}(\text{CN})_6]^{4-}$ .

| <i>System</i>                              | <i>Rg [<math>\text{\AA}</math>]</i> |
|--------------------------------------------|-------------------------------------|
| C12-KR12 + $[\text{Fe}(\text{CN})_6]^{3-}$ | 7.9± 0.4                            |
| C12-KR12 + $[\text{Fe}(\text{CN})_6]^{4-}$ | 7.8 ±0.3                            |
| C14-KR12 + $[\text{Fe}(\text{CN})_6]^{3-}$ | 7.9± 0.6                            |
| C14-KR12 + $[\text{Fe}(\text{CN})_6]^{4-}$ | 7.8 ±0.4                            |

**Table S3.** Radius of gyration (Rg) of two peptide systems (C12-KR12 and C14-KR12) in complex with  $[\text{Fe}(\text{CN})_6]^{3-}$  and  $[\text{Fe}(\text{CN})_6]^{4-}$ , including values for the entire complex and individual peptides.

| <i>System</i>                                                                                                          | <i>Rg (complex) [<math>\text{\AA}</math>]</i> | <i>Rg (peptide 1) [<math>\text{\AA}</math>]</i> | <i>Rg (peptide 2) [<math>\text{\AA}</math>]</i> |
|------------------------------------------------------------------------------------------------------------------------|-----------------------------------------------|-------------------------------------------------|-------------------------------------------------|
| 1. C12-KR12 + $[\text{Fe}(\text{CN})_6]^{3-}$<br>(initial orientation of hydrophobic tails parallel to each other)     | 10.7 ± 1.3                                    | 8.7 ± 0.6                                       | 7.9 ± 0.3                                       |
| 2. C12-KR12 + $[\text{Fe}(\text{CN})_6]^{3-}$                                                                          | Peptides dissociation                         | -                                               | -                                               |
| 3. C12-KR12 + $[\text{Fe}(\text{CN})_6]^{3-}$                                                                          | Peptides dissociation                         | -                                               | -                                               |
| 1. C12-KR12 + $[\text{Fe}(\text{CN})_6]^{3-}$<br>(initial orientation of hydrophobic tails antiparallel to each other) | 11.5 ± 2.7                                    | 10.7 ± 1.1                                      | 8.2 ± 0.3                                       |
| 2. C12-KR12 + $[\text{Fe}(\text{CN})_6]^{3-}$                                                                          | Peptides dissociation                         | -                                               | -                                               |

|                                                                                                                             |                       |           |           |
|-----------------------------------------------------------------------------------------------------------------------------|-----------------------|-----------|-----------|
| 3. C12-KR12 + [Fe(CN) <sub>6</sub> ] <sup>3-</sup>                                                                          | Peptides dissociation | -         | -         |
| 1. C12-KR12 + [Fe(CN) <sub>6</sub> ] <sup>4-</sup><br>(initial orientation of hydrophobic tails parallel to each other)     | 9.8 ± .4              | 8.0 ± 0.3 | 8.1 ± 0.3 |
| 2. C12-KR12 + [Fe(CN) <sub>6</sub> ] <sup>4-</sup>                                                                          | 9.9 ± 0.4             | 8.1 ± 0.3 | 8.1 ± 0.2 |
| 3. C12-KR12 + [Fe(CN) <sub>6</sub> ] <sup>4-</sup>                                                                          | Peptides dissociation | -         | -         |
| 1. C12-KR12 + [Fe(CN) <sub>6</sub> ] <sup>4-</sup><br>(initial orientation of hydrophobic tails antiparallel to each other) | 8.7 ± 0.2             | 8.2 ± 0.3 | 8.2 ± 0.3 |
| 2. C12-KR12 + [Fe(CN) <sub>6</sub> ] <sup>4-</sup>                                                                          | 9.8 ± 1.3             | 8.1 ± 0.3 | 8.0 ± 0.3 |
| 3. C12-KR12 + [Fe(CN) <sub>6</sub> ] <sup>4-</sup>                                                                          | 9.7 ± 0.4             | 8.0 ± 0.2 | 8.2 ± 0.3 |
| 1. C14-KR12 + [Fe(CN) <sub>6</sub> ] <sup>3-</sup><br>(initial orientation of hydrophobic tails parallel to each other)     | Peptides dissociation | -         | -         |
| 2. C14-KR12 + [Fe(CN) <sub>6</sub> ] <sup>3-</sup>                                                                          | Peptides dissociation | -         | -         |
| 3. C14-KR12 + [Fe(CN) <sub>6</sub> ] <sup>3-</sup>                                                                          | 9.9 ± 0.8             | 8.3 ± 0.3 | 8.3 ± 0.3 |
| 1. C14-KR12 + [Fe(CN) <sub>6</sub> ] <sup>3-</sup><br>(initial orientation of hydrophobic tails antiparallel to each other) | Peptides dissociation | -         | -         |
| 2. C14-KR12 + [Fe(CN) <sub>6</sub> ] <sup>3-</sup>                                                                          | 23.5 ± 10.9           | 7.9 ± 0.3 | 8.6 ± 0.5 |
| 3. C14-KR12 + [Fe(CN) <sub>6</sub> ] <sup>3-</sup>                                                                          | 10.8 ± 1.7            | 8.4 ± 0.5 | 8.0 ± 0.3 |
| 1. C14-KR12 + [Fe(CN) <sub>6</sub> ] <sup>4-</sup><br>(initial orientation of hydrophobic tails parallel to each other)     | Peptides dissociation | -         | -         |
| 2. C14-KR12 + [Fe(CN) <sub>6</sub> ] <sup>4-</sup>                                                                          | 12.6 ± 2.9            | 8.1 ± 0.3 | 8.8 ± 0.7 |
| 3. C14-KR12 + [Fe(CN) <sub>6</sub> ] <sup>4-</sup>                                                                          | Peptides dissociation | -         | -         |
| 1. C14-KR12 + [Fe(CN) <sub>6</sub> ] <sup>4-</sup><br>(initial orientation of hydrophobic tails antiparallel to each other) | Peptides dissociation | -         | -         |

|                                                    |                       |   |   |
|----------------------------------------------------|-----------------------|---|---|
| other)                                             |                       |   |   |
| 2. C14-KR12 + [Fe(CN) <sub>6</sub> ] <sup>4-</sup> | Peptides dissociation | - | - |
| 3. C14-KR12 + [Fe(CN) <sub>6</sub> ] <sup>4-</sup> | Peptides dissociation | - | - |

**Table S4.** Solvent-accessible surface area (SASA) of single-peptide systems (C12-KR12 and C14-KR12) in the presence of [Fe(CN)<sub>6</sub>]<sup>3-</sup> and [Fe(CN)<sub>6</sub>]<sup>4-</sup>.

| <i>System</i>                                   | <i>SASA[Å<sup>2</sup>]</i> |
|-------------------------------------------------|----------------------------|
| C12-KR12 + [Fe(CN) <sub>6</sub> ] <sup>3-</sup> | 1836.1 ± 102.1             |
| C12-KR12 + [Fe(CN) <sub>6</sub> ] <sup>4-</sup> | 1768.9 ± 92.2              |
| C14-KR12 + [Fe(CN) <sub>6</sub> ] <sup>3-</sup> | 1818.3 ± 118.3             |
| C14-KR12 + [Fe(CN) <sub>6</sub> ] <sup>4-</sup> | 1739.4 ± 99.8              |

**Table S5.** Solvent-accessible surface area (SASA) of two peptide systems (C12-KR12 and C14-KR12) in the presence of [Fe(CN)<sub>6</sub>]<sup>3-</sup> and [Fe(CN)<sub>6</sub>]<sup>4-</sup>.

| <i>System</i>                                                                                                               | <i>SASA[Å<sup>2</sup>]</i> |
|-----------------------------------------------------------------------------------------------------------------------------|----------------------------|
| 1. C12-KR12 + [Fe(CN) <sub>6</sub> ] <sup>3-</sup><br>(initial orientation of hydrophobic tails parallel to each other)     | 3183.0 ± 189.6             |
| 2. C12-KR12 + [Fe(CN) <sub>6</sub> ] <sup>3-</sup>                                                                          | Peptides dissociation      |
| 3. C12-KR12 + [Fe(CN) <sub>6</sub> ] <sup>3-</sup>                                                                          | Peptides dissociation      |
| 1. C12-KR12 + [Fe(CN) <sub>6</sub> ] <sup>3-</sup><br>(initial orientation of hydrophobic tails antiparallel to each other) | 3365.2 ± 304.3             |
| 2. C12-KR12 + [Fe(CN) <sub>6</sub> ] <sup>3-</sup>                                                                          | Peptides dissociation      |
| 3. C12-KR12 + [Fe(CN) <sub>6</sub> ] <sup>3-</sup>                                                                          | Peptides dissociation      |
| 1. C12-KR12 + [Fe(CN) <sub>6</sub> ] <sup>4-</sup><br>(initial orientation of hydrophobic tails parallel to each other)     | 3572.5 ± 137.9             |
| 2. C12-KR12 + [Fe(CN) <sub>6</sub> ] <sup>4-</sup>                                                                          | 3589.0 ± 182.3             |
| 3. C12-KR12 + [Fe(CN) <sub>6</sub> ] <sup>4-</sup>                                                                          | Peptides dissociation      |
| 1. C12-KR12 + [Fe(CN) <sub>6</sub> ] <sup>4-</sup><br>(initial orientation of hydrophobic tails antiparallel to each other) | 2929.5 ± 178.6             |
| 2. C12-KR12 + [Fe(CN) <sub>6</sub> ] <sup>4-</sup>                                                                          | 2955.5 ± 168.8             |
| 3. C12-KR12 + [Fe(CN) <sub>6</sub> ] <sup>4-</sup>                                                                          | 3065.8 ± 229.4             |
| 1. C14-KR12 + [Fe(CN) <sub>6</sub> ] <sup>3-</sup><br>(initial orientation of hydrophobic tails parallel to each other)     | Peptides dissociation      |
| 2. C14-KR12 + [Fe(CN) <sub>6</sub> ] <sup>3-</sup>                                                                          | Peptides dissociation      |
| 3. C14-KR12 + [Fe(CN) <sub>6</sub> ] <sup>3-</sup>                                                                          | 3108 ± 132.9               |
| 1. C14-KR12 + [Fe(CN) <sub>6</sub> ] <sup>3-</sup><br>(initial orientation of hydrophobic tails antiparallel to each other) | Peptides dissociation      |
| 2. C14-KR12 + [Fe(CN) <sub>6</sub> ] <sup>3-</sup>                                                                          | 3268.0 ± 184.8             |
| 3. C14-KR12 + [Fe(CN) <sub>6</sub> ] <sup>3-</sup>                                                                          | 3315.4 ± 306.4             |
| 1. C14-KR12 + [Fe(CN) <sub>6</sub> ] <sup>4-</sup><br>(initial orientation of hydrophobic tails parallel to each other)     | Peptides dissociation      |
| 2. C14-KR12 + [Fe(CN) <sub>6</sub> ] <sup>4-</sup>                                                                          | 3455.6 ± 142.3             |
| 3. C14-KR12 + [Fe(CN) <sub>6</sub> ] <sup>4-</sup>                                                                          | Peptides dissociation      |
| 1. C14-KR12 + [Fe(CN) <sub>6</sub> ] <sup>4-</sup>                                                                          | Peptides dissociation      |

|                                                                       |                       |
|-----------------------------------------------------------------------|-----------------------|
| (initial orientation of hydrophobic tails antiparallel to each other) |                       |
| 2. C14-KR12 + $[\text{Fe}(\text{CN})_6]^{4-}$                         | Peptides dissociation |
| 3. C14-KR12 + $[\text{Fe}(\text{CN})_6]^{4-}$                         | Peptides dissociation |
